# Supplementary material for: Comprehensive analysis of groundwater hydrochemistry and nitrate health risks in the Baiquan basin, Northern China
Source: PeerJ. 2025 Apr 15;13:e19233. doi: 10.7717/peerj.19233 (PMC12007498; doi:10.7717/peerj.19233)
Supplement: Supplemental Information 1 [file peerj-13-19233-s001.xlsx]

## Sheet: Wet season
	K+	Na+	Ca2+	Mg2+	Cl-	SO42-	HCO3-	NO3-	F-	pH	TH	TDS
J01	1.00	22.0	105	24.9	46	60	291	34.2	0.02	7.57	364	454
J02	0.8	15.7	84.5	18.4	46.6	64.8	218	29.9	0.4	7.03	287	396
J03	0.70	14.5	108	26.8	46.6	71.3	281	32.1	0.39	7.23	380	498
J04	1.15	40.5	184	43.8	181	133	326	53.6	0.02	7.44	640	827
J05	1.30	36.6	245	51.1	327.7	124.2	305	27	0.45	7.4	822	986
J06	0.9	16	103	26.8	39.4	68.4	284	32.7	0.02	7.39	368	634
J07	0.80	18.8	116	27.5	54.5	71.8	288	44.1	0.40	7.12	404	526
J08	0.90	14.1	89.0	18.3	29.9	51.0	250	30.9	0.37	7.31	298	402
J09	1.00	21.6	103	24.5	46.4	57.6	284	32.9	0.4	7.57	357	442
J10	0.80	20.6	117	28.3	58.9	71.5	305	56.5	0.39	7.21	409	546
J11	1.2	23.6	106	25.5	46.9	62.4	309	33	0.36	7.13	370	470
J12	1	34.9	168	30.4	63.1	128	388	67.8	0.34	7.3	536	553
J13	0.7	14.4	107	23.4	38.3	63.6	278	41.8	0.02	7.44	364	468
J14	0.5	28.4	115	25.3	63.3	83	296	69.8	0.36	6.98	392	566
J15	0.70	12.3	114	25.2	35.3	83.5	284	33.8	0.41	7.24	387	474
J16	0.6	10.9	93.4	21.5	29.8	41.7	305	36	0.09	7.28	322	415
J17	0.60	20.5	126	25.9	53.4	92.8	302	46.5	0.36	7.16	422	570
J18	0.9	49.9	134	17.8	102	167	241	37.2	0.35	6.96	409	638
J19	1.3	69.4	143	16.8	121	154	288	50.5	0.31	6.9	426	734
J20	0.7	105	130	13.7	169	131	300	19.9	0.55	6.94	380	758
J21	0.4	18	109	13.1	55.1	63.1	224	55.8	0.3	7.04	327	448
J22	0.7	9.8	111	24.5	25.1	76.7	296	45.1	0.02	7.42	379	442
J23	0.50	9.05	100	20.6	36.9	64.6	241	30.3	0.36	7.23	336	422
J24	0.7	8.2	101	22.3	19.8	63.3	281	39.5	0.02	7.44	343	482
J25	0.8	9.1	102	27.9	20.9	69.8	296	44.6	0.02	7.2	368	428
J26	0.6	6.5	104	31.9	13.6	64.9	352	27.6	0.02	7.23	390	496
J27	0.9	9.1	109	16.6	21.3	64.3	182	42.1	0.26	7.32	341	372
J28	0.60	8.80	108	15.0	21.4	89.1	243	17.8	0.35	7.29	332	402
J29	1.2	9.9	87.7	14	27.9	75.5	200	34.2	0.31	7.08	277	362
J30	1.1	16.9	153	41	43	147	434	34.7	0.3	7.19	550	626
J31	0.80	6.50	125	35.0	16.0	178	284	16.2	0.43	7.17	456	552
J32	0.7	7.1	101	26.2	15.9	84.2	267	16.7	0.36	7.29	359	410
J33	0.70	5.95	108	29.8	14.2	126	272	16.6	0.42	7.26	391	452
J34	0.6	5.6	94	20.7	15.2	67.7	216	17.8	0.3	7.32	319	364
J35	0.9	18.3	159	30.2	54	110	359	73.2	0.3	7.06	522	642
J36	0.6	19.1	154	26.5	50.4	116	377	49.7	0.94	7.22	494	610
J37	0.52	6.50	92.3	20.7	20.3	60.1	236	65.7	0.49	7.00	316	384
J38	0.9	22.1	177	36.3	57.9	165	378	61.3	0.29	7.18	590	704
J39	1	15.6	119	21.9	29.1	75.1	351	44.5	0.14	7.31	386	498
J40	0.6	7.5	106	21	19.7	62.5	285	32	0.27	7.31	352	410
J41	0.6	8	118	20.7	20	76.5	332	33.4	0.26	7.3	378	454
J42	0.6	7.3	98.1	23.5	20.2	49.5	301	46.4	0.06	7.31	342	414
J43	0.5	6.9	100	19.9	16.7	49.1	304	36.4	0.16	7.32	333	396
J44	0.75	7.5	111	21.6	16.4	89	282	25.9	0.29	7.34	365	408
J45	0.7	33.4	82.7	15.4	15.7	128	232	20.5	0.26	6.98	270	432
J46	0.60	5.90	110	20.8	19.2	79.2	240	110	0.39	6.94	361	398
J47	1.2	6.6	71	15.6	16	53.4	156	27.3	0.24	7.4	241	296
J48	0.61	6.70	106	20.7	19.5	58.0	272	92.0	0.38	6.92	351	392
J49	0.75	7.4	110	14.1	16.4	57.4	273	33.7	0.24	7.34	334	385
J50	1.9	12.4	142	13.9	21	159	251	20.4	0.26	7.32	412	478
J51	1.5	17	191	24.9	18	328	268	9.8	0.32	7.26	579	716
J52	1.59	11.0	250	37.3	17.4	542	242	34.1	0.83	6.91	777	792

## Sheet: Dry season
	K+	Na+	Ca2+	Mg2+	Cl-	SO42-	HCO3-	NO3-	F-	pH	TH	TDS
J01	0.89	16	108.22	22.97	37.49	76.57	277.89	38.52	0.2	7.9	364.79	450
J02	0.72	19.82	103.01	22.24	40.9	83.14	277.89	28.19	0.3	7.9	348.78	445
J03	0.65	19.03	119.24	25.52	47.72	111.58	283.18	28.86	0.2	7.7	402.82	503
J04	0.29	41.67	237.47	45.94	153.38	288.79	362.46	52.08	0.2	7.4	782.13	1015
J05	1.12	41.31	317.63	59.55	359.59	308.48	311.11	35.13	0.2	7.5	1038.33	1292
J06	0.69	20.37	120.44	25.28	39.2	102.83	296.01	25.72	0.1	7.6	404.82	494
J07	0.85	23.4	116.03	24.79	54.54	105.01	282.25	41.89	0.1	7.4	391.81	518
J08	1	18.38	78.96	13.98	37.49	37.19	237.69	19.77	0.2	7.2	254.7	335
J09	0.78	16	106.81	23.33	37.49	72.2	274.86	37.89	0.2	7.8	362.79	442
J10	0.94	27.11	122.85	26.37	17.04	214.4	243.63	20.02	0.1	7.8	415.33	560
J11	0.93	27.1	114.83	23.7	46.01	105.01	277.89	37.91	0.1	7.6	384.31	505
J12	0.77	34.75	174.35	26.62	68.17	146.58	374.54	61	0.2	7.9	544.94	716
J13	0.33	10	107.01	22.12	30.68	48.13	305.07	42.39	0.2	7.9	358.29	428
J14	0.46	31.55	139.88	29.29	66.46	98.45	332.25	73.45	0.1	7.6	469.88	620
J15	0.65	19.36	111.82	21.88	37.49	94.07	286.95	31.41	0.3	7.8	369.3	470
J16	0.33	6.82	101.2	19.69	23.86	65.63	289.97	37.65	0.1	7.5	333.77	410
J17	0.56	17.78	134.47	23.58	39.2	146.58	247.68	48.17	0.1	7.7	432.85	543
J18	0.63	42.61	169.14	21.39	88.62	181.58	308.99	41.09	0.2	7.8	510.41	715
J19	0.94	84.25	205.41	24.31	136.34	249.41	344.64	58.45	0.2	7.8	612.99	950
J20	0.51	108.1	166.33	18.84	182.35	166.27	380.58	22.89	0.2	7.9	492.89	870
J21	0.33	21.26	127.86	15.07	51.13	74.38	286.95	53.55	0.2	7.9	381.3	496
J22	0.44	5.45	111.02	21.02	17.04	85.32	308.09	39.17	0.2	7.9	363.79	442
J24	0.63	14.66	106.21	20.42	20.45	76.13	286.95	35.54	0.2	7.6	349.28	425
J25	0.76	15.96	106.21	25.16	17.04	85.35	292.99	43.1	0.1	7.6	368.79	448
J26	0.67	4.09	91.98	29.9	10.23	70.01	338.29	18.06	0.1	7.7	352.78	400
J27	0.56	6.36	121.04	13.98	17.04	87.51	250.7	48.33	0.2	7.8	359.79	430
J28	0.65	14.31	118.24	13.73	59.65	94.07	207.97	53.14	0.1	7.5	351.78	465
J29	0.25	12.91	119.04	17.86	13.63	100.64	274.86	38.03	0.1	7.8	370.8	448
J30	1.01	19.06	141.08	35.37	37.49	199.09	311.11	31.49	0.25	7.3	497.9	632
J31	0.61	9.36	131.46	33.42	10.23	223.15	274.24	12.76	0.4	7.6	465.87	568
J32	0.61	13.26	99	22.36	10.23	109.39	247.68	19.16	0.2	7.8	339.27	405
J33	0.59	9.03	113.03	27.95	13.63	153.14	265.29	14.8	0.25	8.2	397.32	474
J34	0.59	13.02	76.75	20.54	10.63	76.57	247.68	21.16	0.2	7.6	276.22	351
J35	0.47	16.57	156.71	25.64	40.9	150.96	329.23	45.5	0.15	7.9	496.9	612
J36	0.5	23.72	148.9	23.7	47.72	144.39	286.95	56.79	0.25	7.3	469.38	602
J37	0.05	8.81	99.6	18.35	13.63	59.07	274.86	30.13	0.2	7.7	324.26	375
J38	0.68	13.71	128.26	25.64	13.63	168.46	277.89	20.63	0.1	7.5	425.84	518
J39	0.67	9.55	116.74	24.43	27.27	94.07	317.9	44.14	0.1	7.6	392.09	500
J40	0.39	12.96	112.83	17.62	15.34	96.26	259.76	35.64	0.1	7.8	354.28	428
J41	0.11	12.61	122.24	18.96	17.04	98.45	289.97	38.87	0.1	7.8	383.31	462
J42	0.33	12.53	99.8	21.02	18.75	72.2	259.76	46.45	0.1	7.7	335.77	408
J43	0.28	12.66	110.82	18.72	15.34	85.32	289.97	39.16	0.1	7.7	353.78	435
J44	0.55	12.83	92.38	17.26	13.63	100.64	244.66	30.16	0.25	8.1	301.74	396
J45	0.45	29.86	95.39	17.38	13.63	109.39	276.31	26.96	0.35	8.1	309.75	438
J46	0.57	11.4	106.81	19.2	32.38	91.89	243.63	55.21	0.2	7.3	345.78	445
J47	0.88	12.72	63.53	12.27	13.63	54.69	178.21	28.43	0.2	8.2	209.17	282
J48	0.67	11.97	108.42	18.84	15.34	83.14	270.37	45.46	0.1	7.6	348.28	425
J49	0.46	11.82	110.62	9.6	15.34	100.64	247.68	39.62	0.1	7.8	315.75	418
J50	1.44	8.42	134.47	11.06	17.04	155.33	211.43	29.27	0.1	7.9	381.3	470
J51	1.4	11	218.04	23.46	13.63	406.92	214.45	18.64	0.35	7.7	641.01	808
J52	1.49	17.37	252.3	36.34	6.82	616.95	238.62	13.44	0.85	8	779.62	1075
